# Supplementary material for: Pragmatic Considerations in Incorporating Stakeholder Engagement Into a Palliative Care Transitions Study
Source: PubMed Central journal article supplement — Med Care. 2021 Jul 8;59(8 Suppl 4):S370–8. doi: 10.1097/MLR.0000000000001583 (PMC8263137; doi:10.1097/mlr.0000000000001583), 2021-07-08
Supplement: mlr-59-s370-s001.pdf [file mlr-59-s370-s001.pdf]

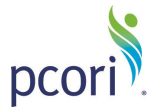

Name: \_\_\_\_\_

### Stakeholder Engagement Survey

*Instructions: Now we want to know more about how you may have influenced the research project. We also want to know what you have learned about engagement.*

1. We want to learn more about your involvement in this research project. Please rate the amount of influence you had on each part of the project listed below.

|                                                          | <i>Amount of Influence</i> |                          |                          |                          | <b>I don't know whether I influenced this part</b> |
|----------------------------------------------------------|----------------------------|--------------------------|--------------------------|--------------------------|----------------------------------------------------|
|                                                          | <b>None</b>                | <b>A small amount</b>    | <b>A moderate amount</b> | <b>A great deal</b>      |                                                    |
| <b>a. Identifying research topics</b>                    | <input type="checkbox"/>   | <input type="checkbox"/> | <input type="checkbox"/> | <input type="checkbox"/> | <input type="checkbox"/>                           |
| <b>b. Developing the research questions</b>              | <input type="checkbox"/>   | <input type="checkbox"/> | <input type="checkbox"/> | <input type="checkbox"/> | <input type="checkbox"/>                           |
| <b>c. Proposal Development</b>                           | <input type="checkbox"/>   | <input type="checkbox"/> | <input type="checkbox"/> | <input type="checkbox"/> | <input type="checkbox"/>                           |
| <b>d. Networking and expanding the research team</b>     | <input type="checkbox"/>   | <input type="checkbox"/> | <input type="checkbox"/> | <input type="checkbox"/> | <input type="checkbox"/>                           |
| <b>e. Study design</b>                                   | <input type="checkbox"/>   | <input type="checkbox"/> | <input type="checkbox"/> | <input type="checkbox"/> | <input type="checkbox"/>                           |
| <b>f. Recruiting or retaining study participants</b>     | <input type="checkbox"/>   | <input type="checkbox"/> | <input type="checkbox"/> | <input type="checkbox"/> | <input type="checkbox"/>                           |
| <b>g. Data collection</b>                                | <input type="checkbox"/>   | <input type="checkbox"/> | <input type="checkbox"/> | <input type="checkbox"/> | <input type="checkbox"/>                           |
| <b>h. Results review, interpretation, or translation</b> | <input type="checkbox"/>   | <input type="checkbox"/> | <input type="checkbox"/> | <input type="checkbox"/> | <input type="checkbox"/>                           |
| <b>i. Dissemination/sharing study findings</b>           | <input type="checkbox"/>   | <input type="checkbox"/> | <input type="checkbox"/> | <input type="checkbox"/> | <input type="checkbox"/>                           |

2. **[Optional]** Please share anything about engaging with researchers on this project that could be improved. *(Use back of form if additional space is needed)*
3. **[Optional]** We would like to learn from your experience. Please share anything you learned about how to engage with researchers on research projects. *(Use back of form if additional space is needed)*



*Instructions: We are now interested in learning more about the way researchers and stakeholders have worked together on this research project.*

4. Please rate the following, thinking about your experiences with the project:

|                                                                                                              | <b>Not at all</b>        | <b>A little</b>          | <b>Somewhat</b>          | <b>A great deal</b>      |
|--------------------------------------------------------------------------------------------------------------|--------------------------|--------------------------|--------------------------|--------------------------|
| <b>a. The project goals were clearly explained to me.</b>                                                    | <input type="checkbox"/> | <input type="checkbox"/> | <input type="checkbox"/> | <input type="checkbox"/> |
| <b>b. The researchers knew the role of the stakeholders on the team and supported the research partners.</b> | <input type="checkbox"/> | <input type="checkbox"/> | <input type="checkbox"/> | <input type="checkbox"/> |
| <b>c. Stakeholders on the team were given the chance to share their views.</b>                               | <input type="checkbox"/> | <input type="checkbox"/> | <input type="checkbox"/> | <input type="checkbox"/> |
| <b>d. Different viewpoints were accepted.</b>                                                                | <input type="checkbox"/> | <input type="checkbox"/> | <input type="checkbox"/> | <input type="checkbox"/> |
| <b>e. The researchers asked for input from stakeholders</b>                                                  | <input type="checkbox"/> | <input type="checkbox"/> | <input type="checkbox"/> | <input type="checkbox"/> |
| <b>f. Researchers responded to input from stakeholders.</b>                                                  | <input type="checkbox"/> | <input type="checkbox"/> | <input type="checkbox"/> | <input type="checkbox"/> |
| <b>g. The researchers clearly explained how input from stakeholders was used.</b>                            | <input type="checkbox"/> | <input type="checkbox"/> | <input type="checkbox"/> | <input type="checkbox"/> |
| <b>h. The researchers and stakeholders on the team truly worked together.</b>                                | <input type="checkbox"/> | <input type="checkbox"/> | <input type="checkbox"/> | <input type="checkbox"/> |
| <b>i. The research project is designed to address the needs of patients.</b>                                 | <input type="checkbox"/> | <input type="checkbox"/> | <input type="checkbox"/> | <input type="checkbox"/> |
| <b>j. I understood my role in the research process.</b>                                                      | <input type="checkbox"/> | <input type="checkbox"/> | <input type="checkbox"/> | <input type="checkbox"/> |
| <b>k. I am satisfied with the decision making process.</b>                                                   | <input type="checkbox"/> | <input type="checkbox"/> | <input type="checkbox"/> | <input type="checkbox"/> |
| <b>l. I received training and support to engage with researchers in the research project.</b>                | <input type="checkbox"/> | <input type="checkbox"/> | <input type="checkbox"/> | <input type="checkbox"/> |

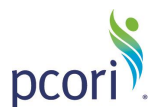

5. **[Optional]** Please provide any additional thoughts about the principles of PCORI assessed above. *(Use back of form if additional space is needed)*

*Instructions: Now we want to learn about things that may have helped you engage in this research project. We also want to learn about things that may have gotten in the way or interfered.*

6. How much did these challenges get in the way of or interfere with engaging with researchers in this project?

|                                                                                                          | Not at all               | Somewhat                 | A great deal             |
|----------------------------------------------------------------------------------------------------------|--------------------------|--------------------------|--------------------------|
| a. The researchers didn't have enough knowledge about engaging with stakeholders as partners             | <input type="checkbox"/> | <input type="checkbox"/> | <input type="checkbox"/> |
| b. The stakeholders didn't have enough knowledge about engaging in research as partners.                 | <input type="checkbox"/> | <input type="checkbox"/> | <input type="checkbox"/> |
| c. The researchers didn't have enough time for engagement with stakeholders                              | <input type="checkbox"/> | <input type="checkbox"/> | <input type="checkbox"/> |
| d. The stakeholders didn't have enough time for engagement with the project                              | <input type="checkbox"/> | <input type="checkbox"/> | <input type="checkbox"/> |
| e. There was a lack of resources for engagement (e.g. funding, meeting space, transportation or parking) | <input type="checkbox"/> | <input type="checkbox"/> | <input type="checkbox"/> |
| f. The researchers didn't value stakeholder input                                                        | <input type="checkbox"/> | <input type="checkbox"/> | <input type="checkbox"/> |
| g. I wasn't appropriately compensated for my time                                                        | <input type="checkbox"/> | <input type="checkbox"/> | <input type="checkbox"/> |

7. **[Optional]** Please share how you solved these challenges. *(Use back of form if additional space is needed)*

8. **[Optional]** Please share any other challenges you have faced that have not already been captured. How and to what extent have you been able to resolve these challenges? *(Use back of form if additional space is needed)*
